# Supplementary material for: Macrophages of distinct origins contribute to tumor development in the lung
Source: PubMed Central journal article supplement — J Exp Med. 2018 Oct 1;215(10):2536–53. doi: 10.1084/jem.20180534 (PMC6170177; doi:10.1084/jem.20180534), 2018-10-01
Supplement: JEM_20180534_sm.pdf [file JEM_20180534_sm.pdf]

Supplemental material

Loyher et al., <https://doi.org/10.1084/jem.20180534>

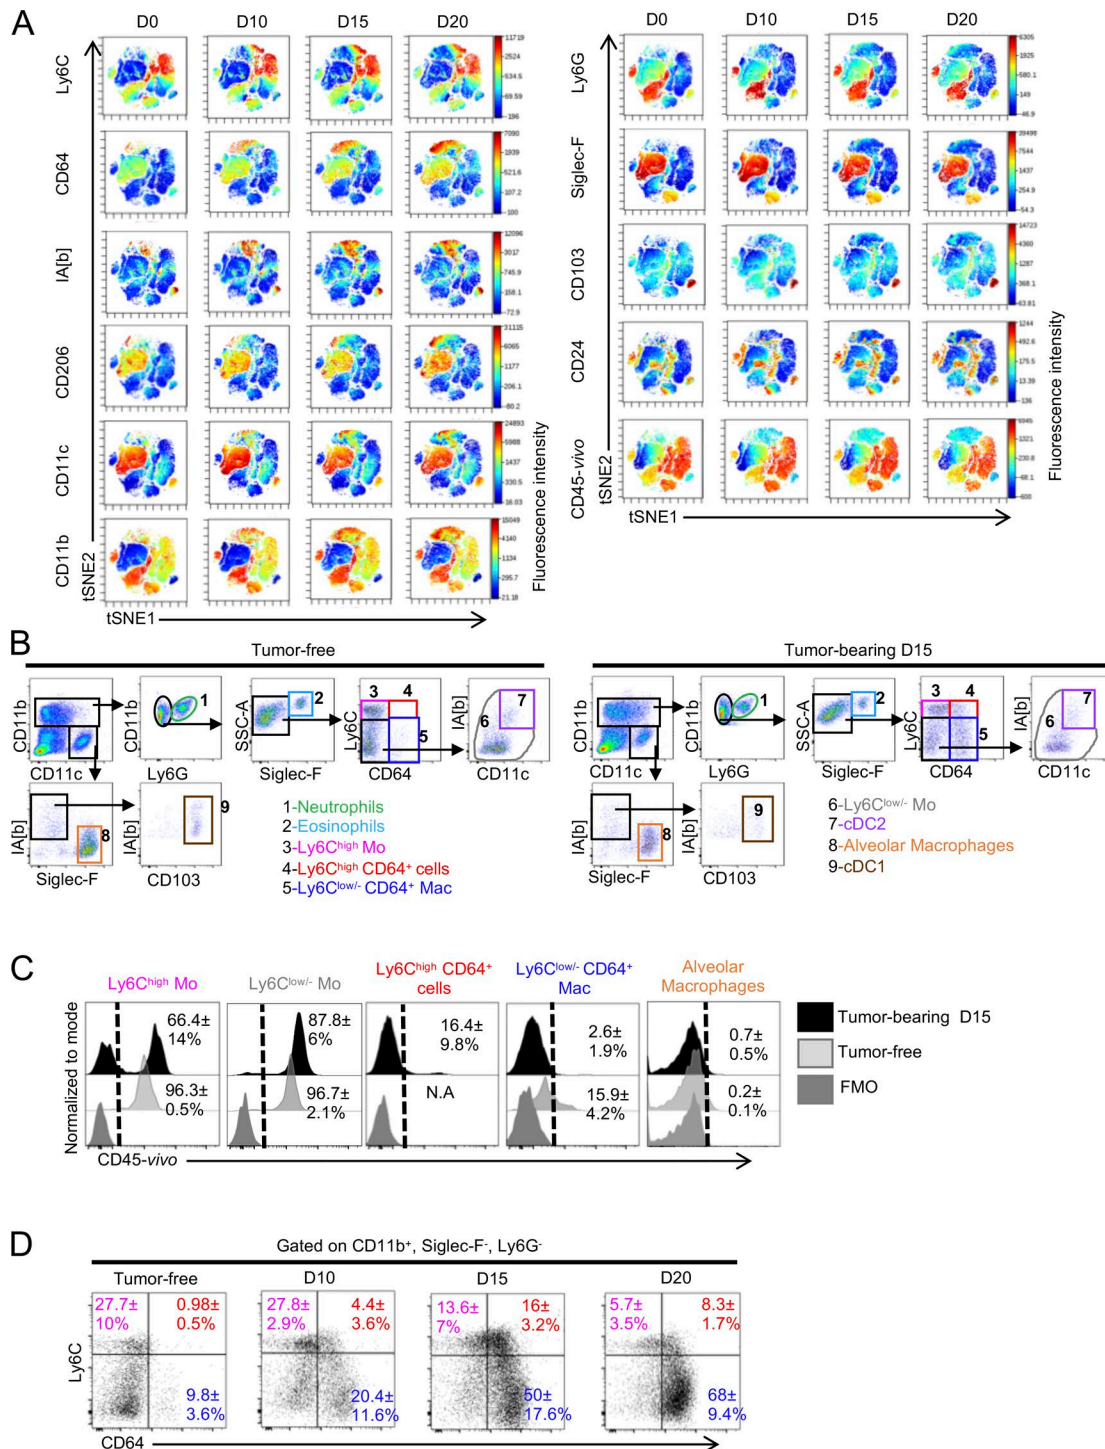

Figure S1. **Lung macrophage subsets differentially accumulate during tumor development (related to Fig. 1).** (A) tSNE dimension 1 and 2 plots of the lung myeloid compartment show relative expression intensity of each indicated phenotypic marker at different time point after TC-1 cell intravenous inoculation. (B) Flow cytometry dot plots of CD45<sup>+</sup> cells show the gating strategy to discriminate lung myeloid cells in tumor-free and tumor-bearing animals. (C) Representative histogram plots show in vivo CD45 labeling by blood/tissue partitioning of each indicated subsets in tumor-free and tumor-bearing mice. (Mean percentage  $\pm$  SD of in vivo CD45<sup>+</sup> cells are indicated). (D) Dot plots show Ly6C and CD64 expressions by CD11b<sup>+</sup>Siglec-F<sup>-</sup>Ly6G<sup>-</sup> lung cells over time after tumor inoculation. Mean percentage  $\pm$  SD of cells in each gate are indicated;  $n = 6-8$  mice per time point out three independent experiments.

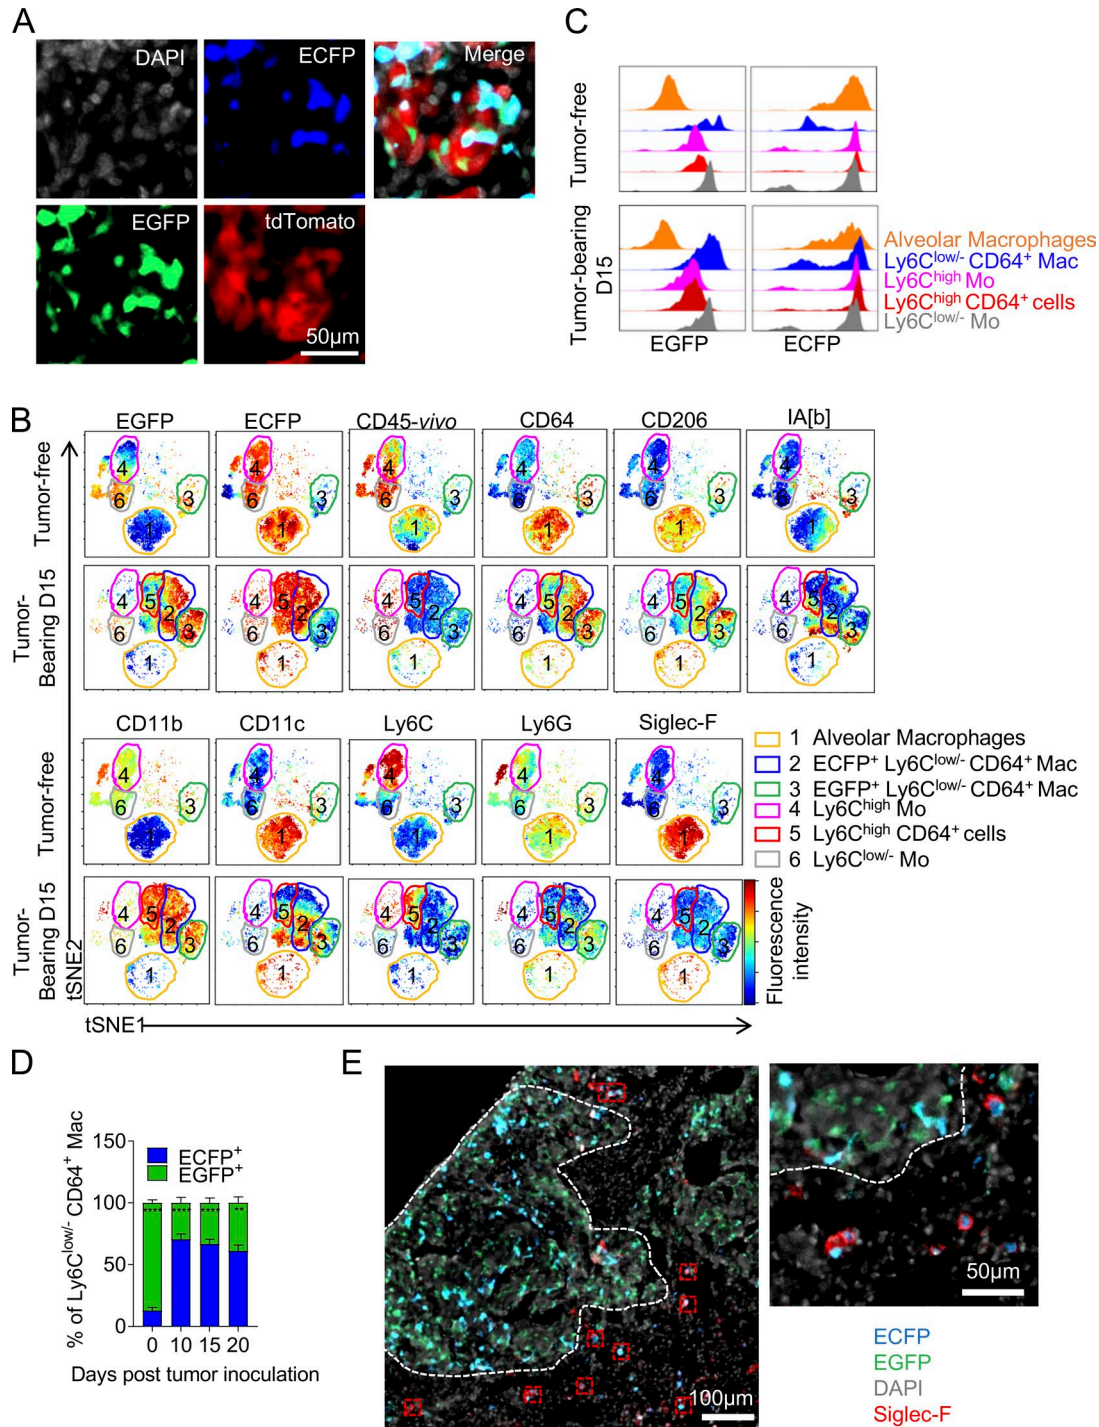

Figure S2. **Macrophages have distinct origins within lung tumors (related to Fig. 2).** (A) Lung cryo-sections from TC-1 tumor-bearing MacBlue  $\times$  *Cx3cr1<sup>EGFP/+</sup>* show typical single channel images. (B) Unsupervised tSNE dimension 1 and 2 analyses indicate the myeloid cell subset clustering according to the relative expression intensity of each indicated phenotypic markers in tumor-free and TC-1 tumor-bearing MacBlue  $\times$  *Cx3cr1<sup>EGFP/+</sup>* mice at day 15. (C) Histogram plots of EGFP and ECFP expression in indicated myeloid subsets in tumor-free and TC-1 tumor-bearing MacBlue  $\times$  *Cx3cr1<sup>EGFP/+</sup>* mice at day 15. (D) Graph shows the relative proportion of EGFP<sup>+</sup> and ECFP<sup>+</sup> Ly6C<sup>low/-</sup> CD64<sup>+</sup> Mac (bars represent mean  $\pm$  SEM from 6–10 mice out of three independent experiments). (E) Lung cryo-sections from TC-1 tumor-bearing MacBlue  $\times$  *Cx3cr1<sup>EGFP/+</sup>* were stained with anti-Siglec-F and show ECFP<sup>+</sup> Siglec-F<sup>-</sup> AM exclusion from tumor nodules. For all panels: \*\*,  $P < 0.01$ ; \*\*\*,  $P < 0.0001$ .

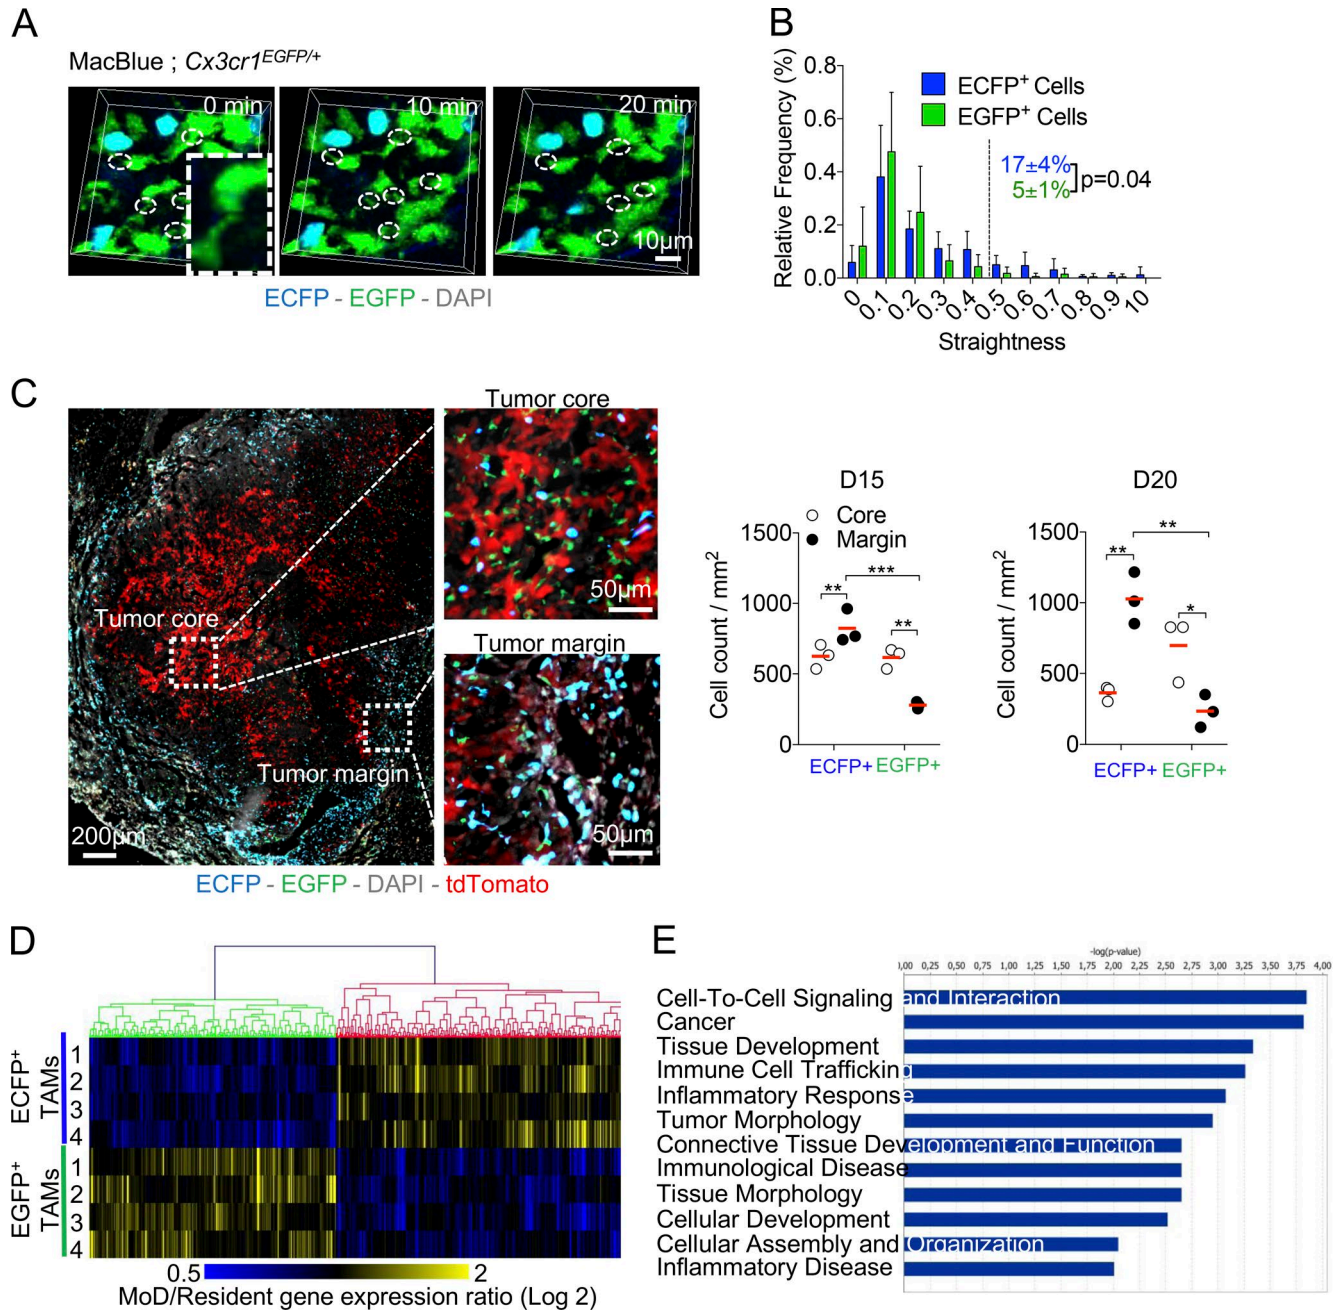

Figure S3. Resident and MoD-TAMs harbor distinct phenotypes and anatomical distribution (related to Fig. 4). (A) Time-lapse TPLSM image sequence showing the dynamic of resident EGFP<sup>+</sup>-TAM interactions (dashed circles). Dashed box is a 2.5× zoom-in of the picture showing cell interaction (B) Graph represents the relative distribution of track straightness of ECFP<sup>+</sup> and EGFP<sup>+</sup> cells in lung tumors at day 15, and the proportion of cells above the threshold are indicated (dashed line). Bars represent mean ± SEM from four mice out of two independent experiments; Mann-Whitney tests were performed. See also Videos 1 and 2. (C) Lung cryo-sections from TC-1<sup>tdTomato</sup> tumor-bearing MacBlue × Cx3cr1<sup>EGFP/+</sup> show ECFP<sup>+</sup> and EGFP<sup>+</sup> cell distribution at the progressing front of lung nodules at day 20. Graphs show quantifications of ECFP<sup>+</sup> and EGFP<sup>+</sup> cells in the tumor core or at the tumor margin. Mice are pooled from two independent experiments; red bars indicate means. (D) Hierarchical clustering of differentially regulated transcripts distinguishes MoD-TAMs and Res-TAMs sorted from lung tumors 20 d after TC-1 inoculation (n = 4 independent cell preparation in each group, each sorting was performed from a pool of two to three mice). (E) Enriched function groups that distinguished MoD-TAMs and Res-TAMs based on Ingenuity Pathways Analysis with a P value cut-off <0.01. For all panels: \*, P < 0.05; \*\*, P < 0.01; \*\*\*, P < 0.001.

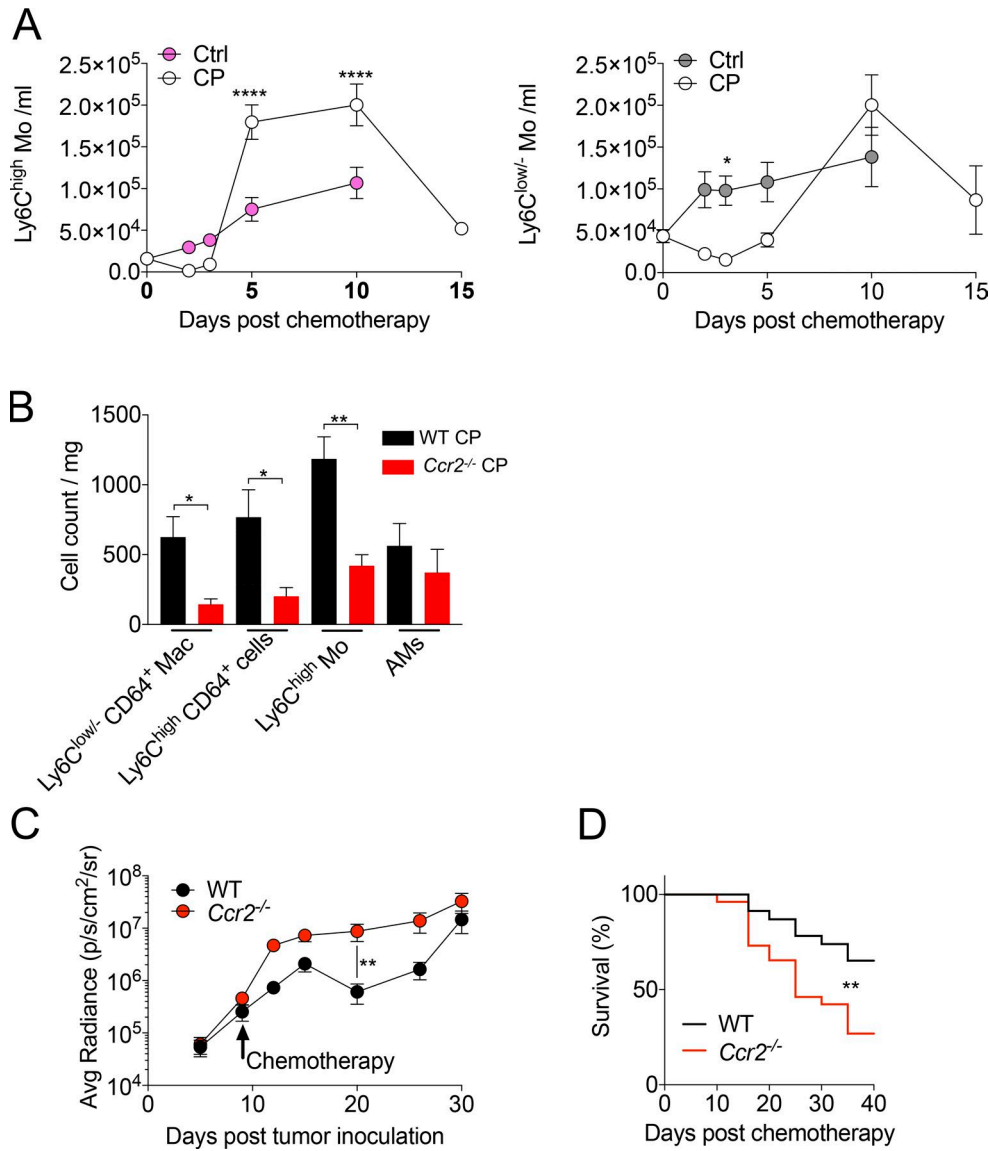

Figure S4. **Distinct sensitivity and recovery of Res-TAMs and MoD-TAMs after chemotherapy (related to Fig. 6).** (A) Graphs represent the kinetic of Ly6C<sup>high</sup>-Mo and Ly6C<sup>low</sup>-Mo recovery in the blood, after CP treatment (mean absolute number/milliliter of blood ± SEM are represented; *n* = 6–10 mice out of two to four independent experiments; two-way ANOVA with Bonferroni multiple comparisons test was performed; only statistical differences compared with day 0 after chemotherapy are indicated for each compartment). (B) Graph shows the absolute number per milligram of tissue of indicated population 15 d after tumor inoculation in WT and *Ccr2*<sup>-/-</sup> mice treated with CP (bars represent mean ± SEM from 10 mice out of three independent experiments; two-way ANOVA with Bonferroni multiple comparisons test was performed). (C) Graph represents the monitoring of tumor growth by bioluminescence imaging after treatment in TC-1-Luc tumor-bearing WT and *Ccr2*<sup>-/-</sup> mice (*n* = 10 mice per group pooled from two independent experiments). (D) Survival curve of WT mice and *Ccr2*<sup>-/-</sup> mice after TC-1 inoculation and CP treatment (*n* = 23–26 mice per group, pooled from four experiments; log-rank [Mantel-Cox] test was performed). For all panels: \*, *P* < 0.05; \*\*, *P* < 0.01; \*\*\*\*, *P* < 0.0001.

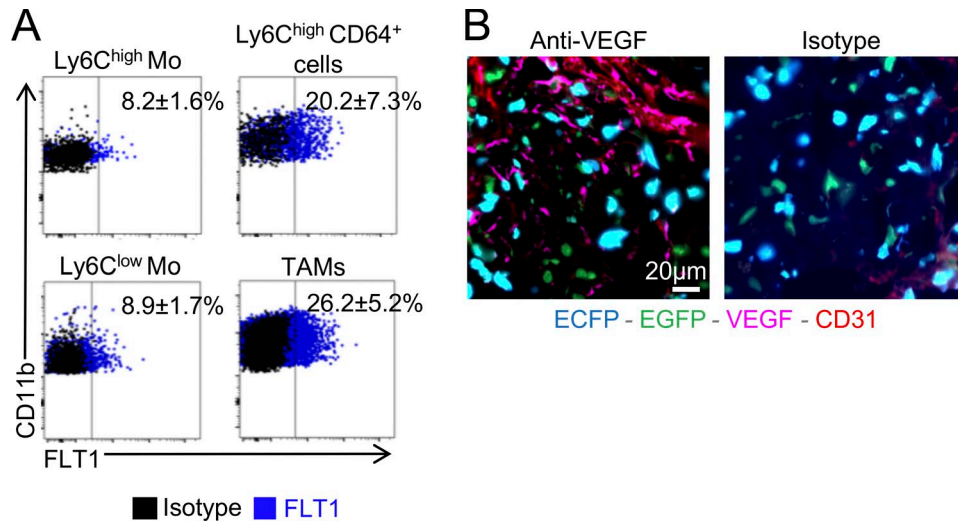

Figure S5. **Anti-VEGF targets Res-TAM and MoD-TAM accumulation (related to Fig. 8).** (A) Dot plots show the expression of FLT1 (VEGF receptor 1) on the indicated subsets. Isotype control staining is overlaid in black. Percentage  $\pm$  SD is indicated;  $n = 8$  mice. (B) Lung cryo-sections from tumor-bearing MacBlue  $\times$  *Cx3cr1<sup>EGFP/+</sup>* mouse show TAM distribution regarding the expression of VEGF in tumor nodules. Anti-VEGF isotype staining is represented (right image). Data are representative of two independent experiments.

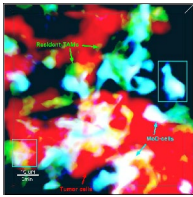

Video 1. **Live imaging of TAM subsets in lung tumors (related to Fig. 4).** 3D live imaging video shows the behaviors of EGFP<sup>+</sup> (green) and ECFP<sup>+</sup> (cyan) in explanted lung of MacBlue  $\times$  *Cx3cr1<sup>EGFP/+</sup>* mouse 15 d after TC-1<sup>tdtomato</sup> cell inoculation (red). Notice the dynamics of ECFP<sup>+</sup> cells (cyan squares) and the interactions between EGFP<sup>+</sup> macrophages (white circles).

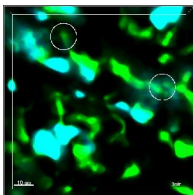

Video 2. **Live imaging of EGFP<sup>+</sup>-TAM interactions in lung tumors (related to Fig. 4).** 3D live imaging video shows the dynamic protrusions (white circles) of EGFP<sup>+</sup> cells (green) in explanted lung of MacBlue  $\times$  *Cx3cr1<sup>EGFP/+</sup>* mouse 15 d after TC-1 cell inoculation.
